# Supplementary material for: Micellization and gelatinization in aqueous media of pH- and thermo-responsive amphiphilic ABC (PMMA82-b-PDMAEMA150-b-PNIPAM65) triblock copolymer synthesized by consecutive RAFT polymerization
Source: Royal Society of Chemistry journal article supplement (doi:10.1039/c7ra04351a), 2017-01-01
Supplement: c7ra04351a1.pdf [file c7ra04351a1.pdf]

## Supporting information

### Micellization and Gelatinization in Aqueous Media of pH- and thermo-responsive Amphiphilic ABC (PMMA<sub>82</sub>-*b*-PDMAEMA<sub>150</sub>-*b*-PNIPAM<sub>65</sub>) Triblock Copolymer Synthesized by Consecutive RAFT Polymerization†

Ye Huang,<sup>a</sup> Ping Yong,<sup>a</sup> Yan Chen,<sup>a</sup> Yuting Gao,<sup>a</sup> Weixiong Xu,<sup>a</sup> Yongkang Lv,<sup>a</sup> Liming Yang,<sup>a</sup> Rui L. Reis,<sup>b</sup> Rogério P. Pirraco,<sup>b</sup> Jie Chen<sup>\*a</sup>

<sup>a</sup>. Department of Chemical Engineering, School of Environmental and Chemical Engineering, Shanghai University, Shangda Road 99, Shanghai 200444, P. R. China Email: jchen@shu.edu.cn Tel: +86 21 66137482

<sup>b</sup>. 3B's Research Group - Biomaterials, Biodegradables and Biomimetics, University of Minho, Portugal

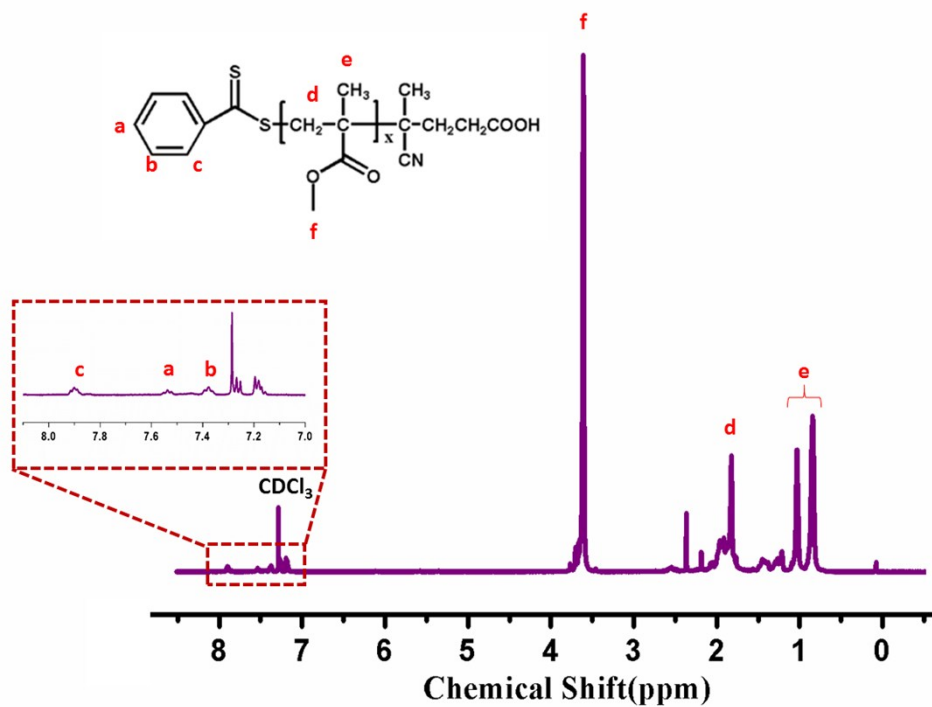

Fig. S1 <sup>1</sup>H-NMR spectrum of PMMA-Macro-CTA in CDCl<sub>3</sub>.

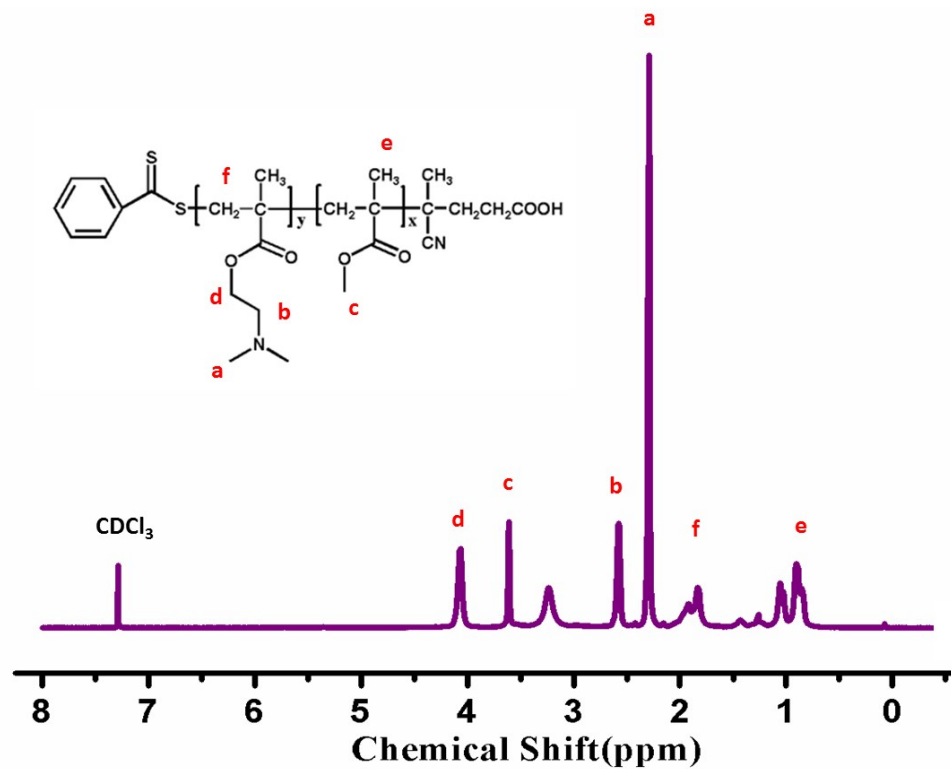

Fig. S2 <sup>1</sup>H-NMR spectrum of PMMA-*b*-PDMAEMA-Macro-CTA in CDCl<sub>3</sub>.

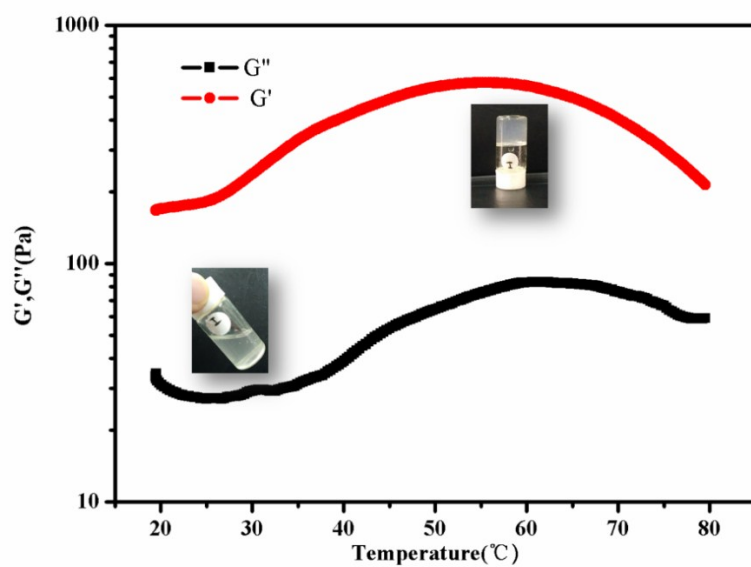

Fig. S3 Temperature dependence of the storage modulus ( $G'$ ) and loss modulus ( $G''$ ) at a constant strain of 0.5 % for a 3 wt. % PMMA-*b*-PDMAEMA-*b*-PNIPAM triblock copolymer at the frequency of 0.16 Hz at pH=4.

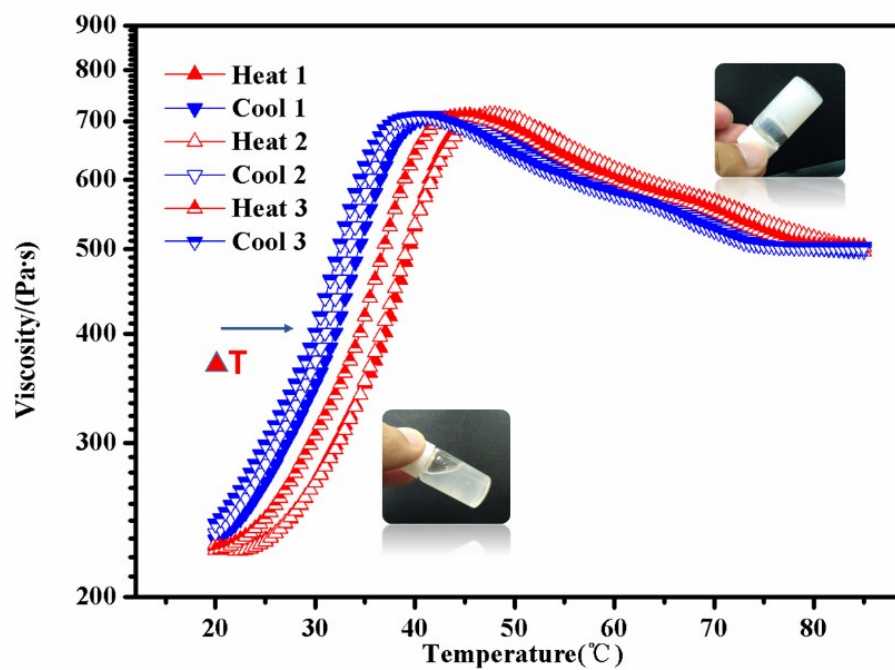

**Fig. S4** Repetitive sol - gel curves of PMMA-*b*-PDMAEMA-*b*-PNIPAM triblock copolymer at pH=4 and 3wt. %. The viscosity and temperature of the concentrated solutions were read on a viscometer.

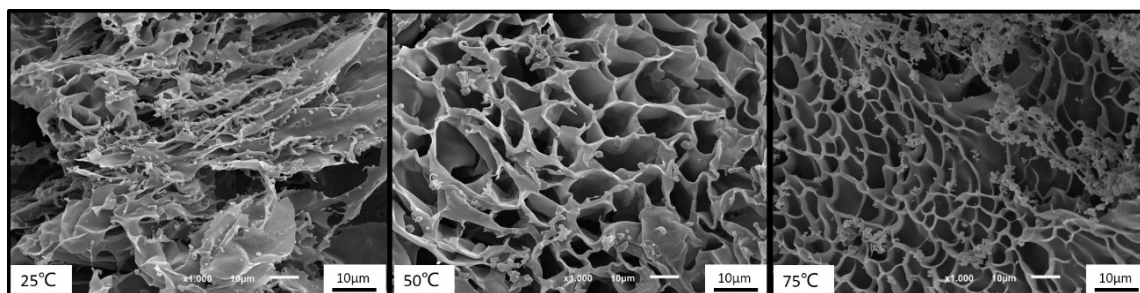

**Fig. S5** SEM images of gelation behaviour at different temperatures at pH=4.

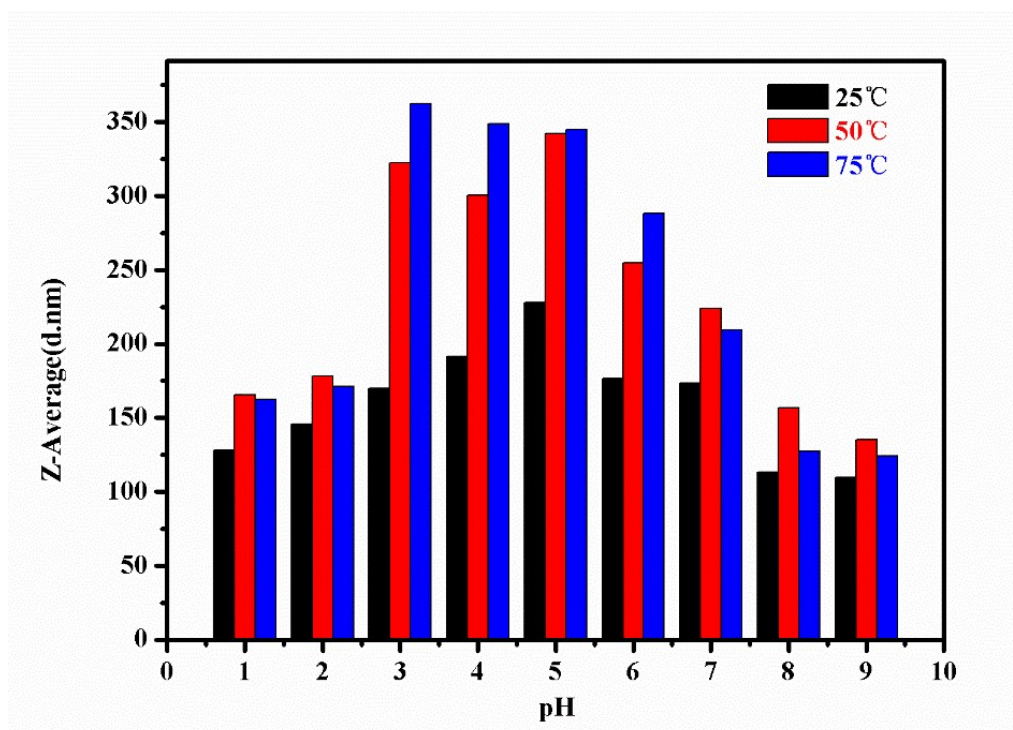

**Fig. S6** Z-Average diameter as a function of selected temperature in a DLS study of  $0.3 \text{ mg mL}^{-1}$  PMMA-*b*-PDMAEMA-*b*-PNIPAM solution at different pH.

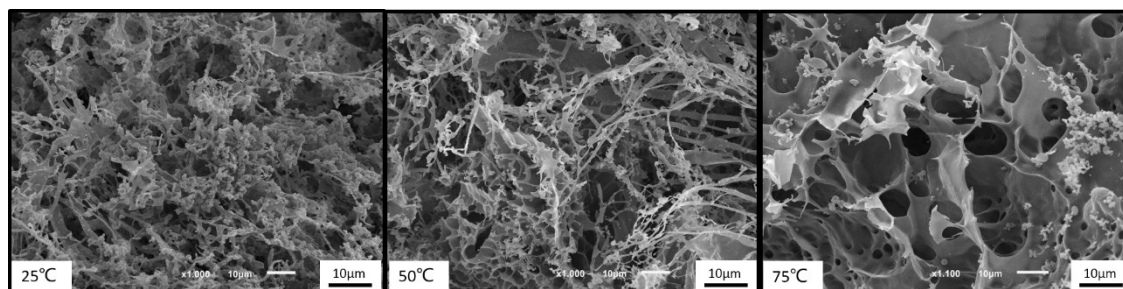

**Fig. S7** SEM images of gelation behaviour at different temperatures at pH=9.
